1 ***%svy\_logistic\_regression*: A generic SAS® macro for simple and multiple logistic regression and**  
2 **creating quality publication-ready tables using survey or non-survey data**

3 **Authors:** Jacques Muthusi <sup>1\*</sup>, Samuel Mwalili <sup>1</sup>, Peter Young <sup>1</sup>

4 **Author affiliations:**

5 <sup>1</sup> Division of Global HIV and Tuberculosis, U.S. Centers for Disease Control and Prevention, Nairobi,  
6 Kenya

7 **\* Corresponding author:**

8 Email address: [mwj6@cdc.gov](mailto:mwj6@cdc.gov) (JM)

9 **Author Contribution**

10 JM and SM took part in concept development. JM developed and documented the SAS macro, and  
11 prepared the final manuscript. SM tested and debugged the SAS macro. PY helped define user  
12 requirements and tested the SAS macro. All authors read and approved of the final manuscript for  
13 publication.

14 **Keywords:** SAS macro, odds ratio, logistic regression, nutrition survey, data reporting, reproducible  
15 research

16 **Competing interests:** The authors have declared that no competing interests exist.

17

## 18 **Abstract**

19 **Introduction:** Reproducible research is increasingly gaining interest in the research community.  
20 Automating the production of research manuscript tables from statistical software can help increase the  
21 reproducibility of findings. Logistic regression is used in studying disease prevalence and associated  
22 factors in epidemiological studies and can be easily performed using widely available software including  
23 SAS, SUDAAN, Stata or R. However, output from these software must be processed further to make it  
24 readily presentable. There exists a number of procedures developed to organize regression output, though  
25 many of them suffer limitations of flexibility, complexity, lack of validation checks for input parameters,  
26 as well as inability to incorporate survey design.

27 **Methods:** We developed a SAS macro, *%svy\_logistic\_regression*, for fitting simple and multiple  
28 logistic regression models. The macro also creates quality publication-ready tables using survey or non-  
29 survey data which aims to increase transparency of data analyses. It further significantly reduces turn-  
30 around time for conducting analysis and preparing output tables while also addressing the limitations of  
31 existing procedures.

32 **Results:** We demonstrate the use of the macro in the analysis of the 2013-2014 National Health and  
33 Nutrition Examination Survey (NHANES), a complex survey designed to assess the health and nutritional  
34 status of adults and children in the United States. The output presented here is directly from the macro and  
35 is consistent with how regression results are often presented in the epidemiological and biomedical  
36 literature, with unadjusted and adjusted model results presented side by side.

37 **Conclusions:** The SAS code presented in this macro is comprehensive, easy to follow, manipulate and  
38 to extend to other areas of interest. It can also be incorporated quickly by the statistician for immediate  
39 use. It is an especially valuable tool for generating quality, easy to review tables which can be incorporated  
40 directly in a publication.

## 41 **Introduction**

42 The principles of reproducible research are increasingly gaining interest both in the research community  
43 (1-5) and in the popular imagination as a result of high-profile failures to reproduce results. While funders  
44 and journals are increasingly requiring both publications and their supporting data be made publicly  
45 available with few exceptions (6-8) there has been less focus on the reproducibility of the analysis process  
46 itself. Reproducible research refers to increasing the transparency of the research endeavor by making the  
47 initial data, detailed analysis steps, and tools available to allow others to reproduce ones' findings. Peng  
48 and Leek refer to increasing reproducibility as a tool to reduce the time required to uncover errors in  
49 analysis (9). One important link in the reproducible research value chain is eliminating manual  
50 reformatting of results from statistical software into draft manuscript tables.

51 In most epidemiological studies, one of the main outcomes of interest is disease prevalence – i.e. the  
52 proportion of all study subjects with a disease. Researchers are often interested in the probability or odds  
53 of subjects having a disease as well as associated predictive factors. These factors can be categorical (such  
54 as gender), ordinal (for example age categories), or continuous (for instance duration on treatment). The  
55 measures of association are often presented as crude (unadjusted) odds ratios from simple logistic  
56 regression or they can be presented as adjusted odds ratios from multiple logistic regression. In scientific  
57 reports from observational epidemiological studies it is common to combine the results from multiple  
58 statistical models and present the odds ratios side by side in complex tables showing the association  
59 between multiple covariates with the outcome of interest, both unadjusted and adjusted.

60 Logistic regression models can be fitted easily using available standard statistical analysis software such  
61 as SAS, SUDAAN, Stata or R, among others, and have been extended to handle weights and/or specialized

62 variance estimation to account for complex survey designs. However, output from these software is not  
63 formatted for use directly in a publication and must be re-organized in order to make it more presentable  
64 based on the cultural norms of the biomedical literature or the specific requirements of the scientific  
65 journal (10, 11). Most epidemiological publications present regression tables showing odds ratios  
66 estimates and the corresponding 95% confidence intervals and/or p-values. They further enrich the output  
67 by including frequencies and proportion of study subjects who experienced the outcome of interest.  
68 Results from simple and multiple regression can also be presented side-by-side in one table. Some  
69 examples of publications which adopt this convention of presenting regression results are provided in the  
70 references (12-15). In order to accomplish this, one has to manually copy different parts of output into a  
71 template. This is both time-consuming and potentially prone to errors when revisions to the analysis are  
72 required.

73 A number of programs have been developed to facilitate conversion of regression output from statistical  
74 analysis software into formatted tables for publications. In Stata, several programs including *esttab* (16,  
75 17), *reformat* (18), *outreg2* (19) are useful in formatting regression output. In R such packages as  
76 *stargazer* (20), *broom* (21), *flextable* (22) have also being found helpful. Though they are useful to  
77 statisticians they suffer from numerous limitations. For instance, they cannot automatically combine  
78 results from several simple logistic regression into a single table. It is also not possible to combine results  
79 from simple and multiple logistic regression into one output table. They are also not fully generic in that  
80 one has to explicitly specify variable labels and levels of categorical variables instead of extracting these  
81 from metadata. Further manipulation of output, for example, concatenating odds ratios and the  
82 corresponding 95% confidence interval into one column cell, has to be done manually which increases the  
83 risk of typographical errors in the output table. In SAS software, logistic regression models can be fitted  
84 using the LOGISTIC, GENMOD and SURVEYLOGISTIC procedures (23), though output from these

85 procedures must be formatted further to make it presentable. SAS provides a flexible and powerful macro  
86 language that can be utilized to create and populate numerous table templates for presenting regression  
87 results. However, limited programming work has being done in SAS to date. There are several macros  
88 including *%table1* (24), *%logistic\_table* (25) and *%UniLogistic* (26) which have been developed to assist  
89 in processing the output from regression procedures, but they are largely limited in terms of flexibility,  
90 lack of support for complex survey designs, or are unable to incorporate both categorical and continuous  
91 variables in one macro call. For instance, the macro, *%table1*, presents variable names instead of the more  
92 meaningful variable labels. The other macros, *%logistic\_table*, and *%UniLogistic*, produce output from  
93 simple logistic regression but not from multiple logistic regression. Also the *%UniLogistic* macro does  
94 not accommodate survey design parameters. Furthermore, these macros lack validation checks for input  
95 parameters and also do not export the output into word processing and spreadsheet programs for ease of  
96 incorporating into a publication.

## 97 **Methods**

98 Recognizing the limitations of existing tools, we have designed a SAS macro, *%svy\_logistic\_regression*,  
99 to help overcome these shortcomings while supporting the principles of reproducible research. The macro  
100 specifically organizes output from SAS procedures and formats it into quality publication epidemiologic  
101 tables containing regression results. We describe the macro functionality and provide an example analysis  
102 of a publicly-available dataset and provide access to the source code for the macro to allow others to use  
103 and extend it to support their own reproducible research.

104 Our developed SAS macro allows for both simple and multiple logistic regression analysis. Moreover,  
105 this SAS macro combines the results from simple and multiple logistic regression analysis into a single

106 quality publication-ready table. The layout of the resulting table is consistent with how models are often  
107 presented in the epidemiological and biomedical literature, with unadjusted and adjusted model results  
108 presented side by side.

109 The macro, written in SAS software version 9.3 (27), runs logistic regression analysis in a sequential and  
110 interactive manner starting with simple logistic regression models followed by multiple logistic regression  
111 models using SAS PROC SURVEYLOGISTIC procedure. Frequencies and totals are obtained using  
112 PROC SURVEYMEANS and PROC SURVEYFREQ procedures. The final output is then processed  
113 using PROC TEMPLATE, PROC REPORT procedures and the output delivery system (ODS).

114 The macro is made up of six sub-macros. The first sub-macro, *%svy\_unilogit*, fine-tunes the dataset by  
115 applying the conditional statements, and computing the analysis domain size, thus preparing a final  
116 analysis dataset. It also prepares the class variables and associated reference categories. It calls the second  
117 and third sub-macros, *%svy\_logitc* and *%svy\_logitn*, to perform separate simple (survey) logistic  
118 regression model on each categorical or continuous predictor variable respectively. It further processes  
119 results outputs into one table. The fourth sub-macro, *%svy\_multilogit*, performs multiple (survey) logistic  
120 regression on selected categorical and continuous predictor variables and processes result outputs into one  
121 table. The fifth sub-macro, *%svy\_printlogit*, combines results from *%svy\_unilogit* and *%svy\_multilogit*  
122 sub-macros and processes the output into an easy to review table which is exported into Microsoft word  
123 processing and excel spreadsheet programs. In addition, where survey design variables have been  
124 specified the macro automatically incorporates them into the computation. The sixth sub-macro,  
125 *%runquit*, is executed after each SAS procedure or DATA step, to enforce in-build SAS validation checks  
126 on the input parameters. These include but not limited to checking if the specified dataset exists, ensuring  
127 required variables are specified, and verifying that values for reference categories for outcome, domain

128 and categorical variables exist and are valid, as well as checking for logical errors. Once an error is  
129 encountered, the macro stops further execution and prints the error message on the log for the user to  
130 address it.

131 The macro is generic in that it can be used to analyze any dataset intended to fit a logistic regression model  
132 from survey or non-survey settings. It accepts both categorical and continuous predictor variables. Where  
133 survey data are used, it allows one to specify design-specific variables such as strata, clusters or weights.  
134 Domain analysis for sub-population estimation is also provided for by the macro. Ignoring domain  
135 analysis and instead performing a subset analysis will lead to incorrect standard errors. For non-survey  
136 settings, the survey input parameters like weights and cluster are set to a default value of 1.

137 The macro also allows the user to explicitly specify the level or category of the binary outcome variable  
138 to model as well as reference categories for categorical predictor variables. Further, it runs sequentially  
139 by first producing results from simple logistic regression from which the user can select predictor variables  
140 to include into the multiple logistic regression, then combine the results of multiple models into a single  
141 table. Apart from including only significant predictor variables, based on global/type3 p-values, the user  
142 can also choose to include any other variables deemed important by subject matter experts. This flexibility  
143 allows for specification of such variables as confounders or effect modifiers even when they are not  
144 statistically significant in the simple logistic model. The final output is then processed into a quality  
145 publication-ready table and exported into word processing and spreadsheet programs for use in the  
146 publication, or if needed, for further hand editing by the authors.

147 The user must provide input parameters which are specified in Table 1. Unless stated (optional), the other  
148 parameters must be provided so that the macro can execute successfully. The *outevent* parameter and  
149 reference categories for class variables are case sensitive and must be specified in the case they appear in



150 the data dictionary. All other parameters are mainly dataset variables and may be specified in any case.  
151 We use lower case for this demonstration. Validation checks enforce these requirements, simplifying  
152 debugging errors in macro invocation. The statistician only interacts with sub-macros 1, 4 and 5 by  
153 providing input parameters. If a permanent SAS dataset is to be analyzed, the LIBNAME statement can  
154 be used to indicate the path or folder where the dataset is located.

155 **Table 1: Input parameters for %svy\_unilogit, %svy\_multilogit and %svy\_printlogit macros**

| parameter                                              | Description                                                                                                                            |
|--------------------------------------------------------|----------------------------------------------------------------------------------------------------------------------------------------|
| <b>%svy_unilogit</b> and <b>%svy_multilogit</b> macros |                                                                                                                                        |
| dataset                                                | name of input dataset                                                                                                                  |
| outcome                                                | name of dependent binary variable of interest e.g., hiv_status                                                                         |
| outevent                                               | value label of outcome variable (without quotation) to model e.g., Positive, in the case of modeling Hepatitis A risk factors          |
| catvars                                                | list of categorical variables (nominal or ordinal) separated by space                                                                  |
| class                                                  | class statement for categorical predictor variables specifying the baseline (reference) category                                       |
| contvars                                               | list of continuous variables separated by space                                                                                        |
| condition                                              | (optional) any conditional statements to create and or fine-tune the final analysis dataset specified using one IF statement           |
| strata                                                 | (optional) survey stratification variable                                                                                              |
| cluster                                                | (optional) survey clustering variable                                                                                                  |
| weight                                                 | (optional) survey weighting variable                                                                                                   |
| domain                                                 | (optional) domain variable for sub-population analysis                                                                                 |
| print                                                  | variable for displaying/suppressing the output table on the output window which takes the values (NO=suppress output, YES=show output) |
| <b>%svysvy_printlogit</b> macro                        |                                                                                                                                        |
| tablename                                              | short name of output table                                                                                                             |
| tabletitle                                             | title of output table                                                                                                                  |
| outcome & outevent                                     | same as defined in <b>%svy_unilogit</b> and <b>%svy_multilogit</b> macros                                                              |
| outdir                                                 | directory for saving output files                                                                                                      |
| <b>%runquit</b> macro                                  |                                                                                                                                        |
| syserr                                                 | SAS in-build macro variable that checks presence of any system errors                                                                  |

## 157 **Results**

### 158 **Example: Analysis of NHANES dataset**

159 We demonstrate the use of our macro in the analysis of the 2013-2014 National Health and Nutrition  
160 Examination Survey (NHANES), a suite of complex surveys designed to assess the health and nutritional  
161 status of adults and children in the United States (U.S.). In brief, the main objectives of the survey were  
162 to estimate and monitor trends in prevalence of selected diseases, risk behaviors and environmental  
163 exposures among targeted populations, to explore emerging public health issues, and to provide baseline  
164 health characteristics for other administrative use (28).

165 NHANES used a four-stage, stratified sampling design, where counties were selected as primary sampling  
166 units (PSUs) using probability proportionate to size (PPS) in the first stage. The second stage involved  
167 selecting sections of counties that consisted of a block containing a cluster of households with  
168 approximately equal sample sizes per PSU. Dwelling units including households were then selected in the  
169 third stage with approximately equal selection probabilities. Individuals within a household were selected  
170 in the fourth stage. Stratification was done based on selected demographics characteristics of PSUs.  
171 Survey weights were then computed using the various sampling probabilities to account for the complex  
172 survey design. The data files are freely available to the public on the NHANES website at:  
173 <https://www.cdc.gov/nchs/nhanes/Index.htm>. See (29) for more details regarding the NHANES survey  
174 design and contents.

175 The dataset (`clean_nhanes`) used in this example includes participants' socio-demographic  
176 characteristics including `riagendr` (Gender), `ridageyr` (Age in years at screening), `ridreth1`,  
177 (Race/Hispanic origin), `dmqadfc` (Service in a foreign country), `dmdeduc2` (Education level among

178 adults aged 20+ years), and `dmdmart1` (Marital status). The binary outcome variable is `lhxha`  
179 (Hepatitis A antibody test result). The aim of the analysis is to investigate factors associated with a positive  
180 test for Hepatitis A antibody among participants aged 20+ years who have served active duty in the U.S.  
181 Armed Forces (`dmqmiliz`). Appropriate survey weights `wtmec2yr` (sample weights for participants  
182 with a medical examination) were applied. The macros were run with user-defined parameters. The user  
183 should explicitly specify the reference category for factor variables and for the binary outcome, as shown  
184 in Figure 1.

185 **Figure 1: Sample `%svy_logistic_regression` macro call**

```
%let dir = C:/NHANES/SAS;

* call svy_logistic_regression macro;
option mlogic mprint symbolgen;

* initialize data and outcome variable;
%let dataset = clean_nhanes;
%let outcome = lhxha;
%let outevent = Positive;

* define simple logistic regression model input parameters;
%let classvarb = riagendr(ref="Male") ridageyr<math>cat2</math> (ref=">= 60") ridreth1
(ref="Non-Hispanic White") dmquadfc (ref="No") dmddeduc2 (ref="Some college
or AA degree") dmdmart1 (ref="Divorced");

%let catvarsb = riagendr ridageyr<math>cat2</math> ridreth1 dmquadfc dmddeduc2 dmdmart1;
%let contvarsb = ridageyr;

* fit simple logistic regression model;
%svy_unilogit(dataset = &dataset.,
              outcome = &outcome.,
              outevent = &outevent.,
              catvars = &catvarsb.,
              contvars = &contvarsb.,
              class = &classvarb.,
              weight = wtmec2yr,
              cluster = sdmvpsu,
              strata = sdmvstra,
              domain = dmqmiliz,
              domvalue = 1,
              condition = if ridageyr>=20,
              print = YES);
```

```
* define parameters for selected predictor variables;
%let classvarm = riagendr(ref="Male") ridageyrct2 (ref=">= 60") ridreth1
(ref="Non-Hispanic White") dmqadfc (ref="No") dmdmartl (ref="Divorced");
%let catvarsm = riagendr ridageyrct2 ridreth1 dmqadfc dmdmartl;
%let contvarsm =;

* fit multiple logistic regression model;
%svy_multilogit (dataset = &dataset.,
                outcome = &outcome.,
                outevent = &outevent.,
                catvars = &catvarsm.,
                contvars = &contvarsm.,
                class = &classvarm.,
                weight = wtmec2yr,
                cluster = sdmvpsu,
                strata = sdmvstra,
                domain = dmqmiliz,
                domvalue = 1,
                condition = if ridageyr>=20,
                print = YES);

* output final table;
%svy_printlogit (tablename = logit_table,
                outcome = &outcome.,
                outevent = &outevent.,
                outdir = &dir./output/tables,
                tablettitle = Table 2: Factors associated with Hepatitis A
prevalence among participants who served in the US Armed Forces - NHANES
2013-2014);
```

186

187 The complete SAS output consists of several tables, the majority of which are auxiliary and are used to  
188 help in processing the output. Two important output tables are the simple and the multiple logistic  
189 regression tables. The simple logistic regression table shows result of bivariate regression as shown in  
190 Table 2.

191

192 **Table 2: Output of simple logistic regression model results from %svy\_unilogit macro**

| Factor                      | N <sup>@</sup> | Freq <sup>&amp;</sup> | OR_CI <sup>§</sup> | p_value <sup>α</sup> | g_p_value <sup>β</sup> |
|-----------------------------|----------------|-----------------------|--------------------|----------------------|------------------------|
| Gender                      |                |                       |                    |                      |                        |
| Male                        | 473            | 205 (37.7)            | ref                |                      |                        |
| Female                      | 35             | 15 (39.7)             | 1.1 (0.4-2.7)      | 0.86                 | 0.86                   |
| Total                       | 508            | 220 (37.9)            |                    |                      |                        |
| Age in years at screening   |                |                       |                    |                      |                        |
| >= 60                       | 322            | 131 (30.7)            | ref                |                      |                        |
| 20-39                       | 51             | 39 (83.0)             | 11.0 (5.4-22.2)    | <.01                 | <.01                   |
| 40-59                       | 135            | 50 (31.2)             | 1.0 (0.6-1.7)      | 0.93                 |                        |
| Total                       | 508            | 220 (37.9)            |                    |                      |                        |
| Race/Hispanic origin        |                |                       |                    |                      |                        |
| Non-Hispanic White          | 307            | 114 (34.1)            | ref                |                      |                        |
| Mexican American            | 23             | 14 (67.1)             | 3.9 (1.3-12.3)     | 0.02                 | <.001                  |
| Non-Hispanic Black          | 126            | 59 (46.1)             | 1.7 (1.2-2.4)      | 0.01                 |                        |
| Other Hispanic              | 26             | 17 (64.3)             | 3.5 (1.0-11.8)     | 0.05                 |                        |
| Other Race                  | 26             | 16 (52.3)             | 2.1 (0.7-6.8)      | 0.21                 |                        |
| Total                       | 508            | 220 (37.9)            |                    |                      |                        |
| Served in a foreign country |                |                       |                    |                      |                        |
| No                          | 243            | 86 (27.4)             | ref                |                      |                        |
| Yes                         | 264            | 134 (48.6)            | 2.5 (1.4-4.5)      | <.01                 | <.01                   |
| Total                       | 507            | 220 (38.1)            |                    |                      |                        |
| Education level             |                |                       |                    |                      |                        |
| Some college or AA degree   | 193            | 92 (41.8)             | ref                |                      |                        |
| 9-11th grade                | 37             | 16 (33.4)             | 0.7 (0.4-1.3)      | 0.27                 | 0.30                   |
| College graduate or above   | 147            | 51 (32.0)             | 0.7 (0.4-1.1)      | 0.09                 |                        |
| High school graduate        | 122            | 92 (47.7)             | 1.0 (0.6-1.5)      | 0.88                 |                        |
| Less than 9th grade         | 9              | 5 (42.6)              | 1.0 (0.2-4.5)      | 0.97                 |                        |
| Total                       | 508            | 220 (37.9)            |                    |                      |                        |
| Marital status              |                |                       |                    |                      |                        |
| Divorced                    | 75             | 30 (29.4)             | ref                |                      |                        |
| Living with partner         | 17             | 9 (60.2)              | 3.6 (1.1-11.7)     | 0.03                 | 0.03                   |
| Married                     | 311            | 130 (36.3)            | 1.4 (0.8-2.3)      | 0.23                 |                        |
| Never married               | 48             | 21 (51.4)             | 2.5 (1.1-6.1)      | 0.04                 |                        |
| Separated                   | 11             | 5 (27.3)              | 0.9 (0.3-2.6)      | 0.85                 |                        |
| Widowed                     | 46             | 25 (44.0)             | 1.9 (0.9-4.1)      | 0.11                 |                        |
| Total                       | 508            | 220 (37.9)            |                    |                      |                        |
| Age in years at screening   | 508            | 220 (37.9)            | 1.0 (1.0-1.0)      | <.01                 | <.01                   |

193 <sup>@</sup> = Total number of observations

194 <sup>&</sup> = Frequency of sample cases (and weighted row percentages)

195 <sup>§</sup> = Weighted Odds Ratio (95% confidence interval)

196 <sup>α</sup> = Class level p-value

197  $\beta = \text{Global/Type 3 p-value}$

198 The table consists of six variables, namely: `Factor` (risk factor variable), `N` (total frequency of  
199 observations), `Freq` (frequency of sample cases and corresponding weighted row percentages), `OR_CI`  
200 (weighted odds ratio and 95% confidence interval) `p_value` (class level p-value), `g_p_value`  
201 (global/type3 p-value). Typically the analyst/researcher selects statistically-important risk factors based  
202 on the global/type3 p-values. From this example, all risk factors except gender and education level were  
203 statistically significant. However, based on epidemiological considerations, gender and age are often  
204 treated as potential confounder variables. Thus they are included in the multiple logistic regression model  
205 regardless of statistical significance. Another important aspect to pick from Table 2 is the frequency  
206 columns which show the sample size for each factor and each level of the factor. In this example the  
207 expected total measurements for each factor was n=508 out of which 220 (37.8%) tested positive for  
208 Hepatitis A antibody. All other factors except service in a foreign country (n=507) had complete  
209 information available. The importance of this is to ensure that factors with substantive proportion of  
210 complete information are selected for inclusion in the multiple logistic regression model. In addition, the  
211 row percentages provide guidance on the choice of reference category of factor variables. However, for  
212 ordinal factors it is often advisable to use the lowest or highest category as reference, depending on the  
213 outcome of interest. After selecting all important variables, the `%svy_multilogit` macro is then executed.  
214 The `%svy_printlogit` macro automatically processes the output into a quality easy to review output as  
215 shown in Table 3.

216

217 **Table 3: Quality publication-ready output from the %svy\_printlogit macro combining results from**  
 218 **%svy\_unilogit and %svy\_multilogit macros**

| Characteristic              | Hepatitis A antibody <sup>€</sup> |                                                 | Unadjusted odds ratios                    |                      |                               | Adjusted odds ratios |         |                  |
|-----------------------------|-----------------------------------|-------------------------------------------------|-------------------------------------------|----------------------|-------------------------------|----------------------|---------|------------------|
|                             | Total <sup>¥</sup>                | Positive <sup>£</sup><br>n (%) <sup>&amp;</sup> | OR <sup>ξ</sup> (95% CI)<br><sup>\$</sup> | p-value <sup>α</sup> | Type3 <sup>β</sup><br>p-value | OR (95% CI)          | p-value | Type3<br>p-value |
| Gender                      |                                   |                                                 |                                           |                      |                               |                      |         |                  |
| Male                        | 473                               | 205 (43.3)                                      | ref                                       |                      |                               |                      |         |                  |
| Female                      | 35                                | 15 (42.9)                                       | 1.1 (0.4-2.7)                             | 0.86                 | 0.86                          | 1.0 (0.3-3.7)        | 1.00    | 1.00             |
| Total                       | 508                               | 220 (43.3)                                      |                                           |                      |                               |                      |         |                  |
| Age in years at screening   |                                   |                                                 |                                           |                      |                               |                      |         |                  |
| >= 60                       | 322                               | 131 (40.7)                                      | ref                                       |                      |                               |                      |         |                  |
| 20-39                       | 51                                | 39 (76.5)                                       | 11.0 (5.4-22.2)                           | <.01                 | <.01                          | 13.8 (5.6-34.0)      | <.01    | <.01             |
| 40-59                       | 135                               | 50 (37)                                         | 1.0 (0.6-1.7)                             | 0.93                 |                               | 1.3 (0.6-2.8)        | 0.54    |                  |
| Total                       | 508                               | 220 (43.3)                                      |                                           |                      |                               |                      |         |                  |
| Race/Hispanic origin        |                                   |                                                 |                                           |                      |                               |                      |         |                  |
| Non-Hispanic White          | 307                               | 114 (37.1)                                      | ref                                       |                      |                               |                      |         |                  |
| Mexican American            | 23                                | 14 (60.9)                                       | 3.9 (1.3-12.3)                            | 0.02                 | <.01                          | 3.4 (1.1-10.4)       | 0.03    | 0.01             |
| Non-Hispanic Black          | 126                               | 59 (46.8)                                       | 1.7 (1.2-2.4)                             | 0.01                 |                               | 1.9 (1.1-3.2)        | 0.02    |                  |
| Other Hispanic              | 26                                | 17 (65.4)                                       | 3.5 (1.0-11.8)                            | 0.05                 |                               | 3.4 (0.6-18.6)       | 0.16    |                  |
| Other Race                  | 26                                | 16 (61.5)                                       | 2.1 (0.7-6.8)                             | 0.21                 |                               | 1.4 (0.3-6.9)        | 0.65    |                  |
| Total                       | 508                               | 220 (43.3)                                      |                                           |                      |                               |                      |         |                  |
| Served in a foreign country |                                   |                                                 |                                           |                      |                               |                      |         |                  |
| No                          | 243                               | 86 (35.4)                                       | ref                                       |                      |                               |                      |         |                  |
| Yes                         | 264                               | 134 (50.8)                                      | 2.5 (1.4-4.5)                             | <.01                 | <.01                          | 3.1 (1.9-5.0)        | <.01    | <.01             |
| Total                       | 507                               | 220 (43.4)                                      |                                           |                      |                               |                      |         |                  |
| Education level             |                                   |                                                 |                                           |                      |                               |                      |         |                  |
| Some college or AA degree   | 193                               | 92 (47.7)                                       | ref                                       |                      |                               |                      |         |                  |
| 9-11th grade                | 37                                | 16 (43.2)                                       | 0.7 (0.4-1.3)                             | 0.27                 | 0.30                          |                      |         |                  |
| College graduate or above   | 147                               | 51 (34.7)                                       | 0.7 (0.4-1.1)                             | 0.09                 |                               |                      |         |                  |
| High school graduate        | 122                               | 56 (45.9)                                       | 1.0 (0.6-1.5)                             | 0.88                 |                               |                      |         |                  |
| Less than 9th grade         | 9                                 | 5 (55.6)                                        | 1.0 (0.2-4.5)                             | 0.97                 |                               |                      |         |                  |
| Total                       | 508                               | 220 (43.3)                                      |                                           |                      |                               |                      |         |                  |
| Marital status              |                                   |                                                 |                                           |                      |                               |                      |         |                  |
| Divorced                    | 75                                | 30 (40.0)                                       | ref                                       |                      |                               |                      |         |                  |
| Living with partner         | 17                                | 9 (52.9)                                        | 3.6 (1.1-11.7)                            | 0.03                 | 0.03                          | 1.8 (0.6-5.1)        | 0.27    | 0.02             |
| Married                     | 311                               | 130 (41.8)                                      | 1.4 (0.8-2.3)                             | 0.23                 |                               | 1.6 (1.0-2.4)        | 0.06    |                  |



|                           |     |            |               |      |      |               |      |  |
|---------------------------|-----|------------|---------------|------|------|---------------|------|--|
| Never married             | 48  | 21 (43.8)  | 2.5 (1.1-6.1) | 0.04 |      | 1.5 (0.9-2.7) | 0.13 |  |
| Separated                 | 11  | 5 (45.5)   | 0.9 (0.3-2.6) | 0.85 |      | 0.9 (0.3-2.9) | 0.88 |  |
| Widowed                   | 46  | 25 (54.3)  | 1.9 (0.9-4.1) | 0.11 |      | 3.2 (1.5-6.7) | <.01 |  |
| Total                     | 508 | 220 (43.3) |               |      |      |               |      |  |
| Age in years at screening | 508 | 220 (43.3) | 1.0 (1.0-1.0) | <.01 | <.01 |               |      |  |

219 ¥ = Total number of observations

220 € = Outcome variable label

221 £ = Outcome value label of category of interest

222 & = Frequency of sample cases (and weighted row percentages)

223 ξ = Weighted Odds Ratio

224 \$ = Weighted 95% confidence interval for Odds Ratio

225 α = Class level p-value

226 β = Global/Type3 p-value

227

## 228 **Discussion**

229 This paper presents an elegant and flexible SAS macro, *%svy\_logistic\_regression*, for producing quality  
230 publication-ready tables from unadjusted and adjusted logistic regression analyses. Even though a number  
231 of SAS macros are available on the internet for processing output from logistic regression into a  
232 publication-ready table, they are complex to follow and/or have limited features, thus restricting their  
233 adoption. Many macros are not generic and hence can only be used with the data for which they were  
234 designed.

235 The SAS macro presented here is generalized, highly suitable to handle different scenarios, and is simple  
236 to implement and invoke from user macros. In addition, our macro includes the row or column total and  
237 frequency of prevalent cases of each variable level, which can immediately allow the analyst/researcher  
238 to identify levels with sparse data. Row percentages help the researcher in the choice of reference category.  
239 Global or type3 p-values shows whether or not a variable is an important predictor. Individual p-values  
240 shows if a given variable category is comparable to the reference category. The macro provides validation  
241 checks on the input parameters including the dataset, variables and values of variables to ensure that the  
242 analyst obtains valid estimates. The output of this SAS macro helps improve efficiency of knowledge  
243 generation by reducing the steps required from analysis to clear and concise presentation of results.

## 244 **Conclusion**

245 As our contribution to the emerging field of reproducible research, we have provided source code for the  
246 SAS macro as well as expected outputs using a publicly available dataset. By publishing this macro, it  
247 will allow other SAS macro programmers and users to verify and build upon this code. Production of

248 publication-quality tables is increasingly important as data analyses become more complex, involving  
249 larger datasets and requiring more sophisticated computations and tabulation, notwithstanding the need  
250 for quick results. This macro helps to make data analysis results readily available, and allows one to  
251 publish data summaries in a single document, thus allowing others to easily execute the same code to  
252 obtain the same results. The quality, publication-ready results from this macro are suitable for direct  
253 inclusion in manuscripts for peer-reviewed journals. The macro can also be used to routinely generate  
254 standardized tables. This is especially useful for disease surveillance systems where the same analyses are  
255 repeated on a quarterly or annual basis. We hope the published results from this macro will provide

## 256 **Supporting information**

### 257 **Supporting results dataset**

258 The NHANES dataset supporting the conclusions of this article is freely available to the public on  
259 the NHANES website at: <https://www.cdc.gov/nchs/nhanes/Index.htm>.

### 260 **Supporting software**

261 The source code for this macro is available online at <https://github.com/kmuthusi/generic-sas-macros> for  
262 public access and has been licensed under the terms of the Apache Software License and therefore is  
263 licensed under ASL v2 or later. A copy on this license is available at  
264 <http://www.apache.org/licenses/LICENSE-2.0.html>. Sample SAS program call for the macro named  
265 “*svy logistic regression anafile.sas*” is provided.

### 266 **Funding**

267 This work was supported by the President’s Emergency Plan for AIDS Relief (PEPFAR) through the U.S.  
268 Centers for Disease Control and Prevention (CDC). The funders had no role in study design, data  
269 collection and analysis, decision to publish, or preparation of the manuscript.

270 **Acknowledgement**

271 We thank our colleagues in the Surveillance and Epidemiology branch for testing the SAS macro and  
272 providing valuable feedback for improvement and also for thoroughly reviewing the manuscript.

## 273 **References**

- 274 1. Peng RD, Dominici F, Zeger SL. Reproducible epidemiologic research. American Journal of  
275 Epidemiology. 2006;163(9):783-9.
- 276 2. Peng RD. Reproducible research in computational science. Science. 2011;334(6060):1226-7.
- 277 3. Peng RD. Reproducible research and Biostatistics. Biostatistics. 2009;10(3):405-8.
- 278 4. Iqbal SA, Wallach JD, Khoury MJ, Schully SD, Ioannidis JP. Reproducible Research Practices and  
279 Transparency across the Biomedical Literature. PLoS Biol. 2016;14(1):e1002333.
- 280 5. Arnold Tim, Kuhfeld Warren F. Using SAS and LATEX to Create Documents with Reproducible  
281 Results. URL: <http://supportsas.com/resources/papers/proceedings12/324-2012pdf>. 2012.
- 282 6. Wellcome Trust. Policy on data, software and materials management and sharing 2017 [  
283 7. Wellcome Trust. Open access policy 2017 [  
284 8. U S Department of Health and Human Services. Open Government Plan. 2016. p. 48-9.
- 285 9. Leek JT, Peng RD. Opinion: Reproducible research can still be wrong: adopting a prevention  
286 approach. Proc Natl Acad Sci U S A. 2015;112(6):1645-6.
- 287 10. Altman DG, Gore SM, Gardner MJ, Pocock SJ. Statistical guidelines for contributors to medical  
288 journals. British Medical Journal (Clinical research ed). 1983;286(6376):1489-93.
- 289 11. Lang TA, Altman DG. Basic statistical reporting for articles published in clinical medical journals:  
290 the SAMPL Guidelines. In: Smart P, Maisonneuve H, Polderman A (eds). Science Editors' Handbook,  
291 European Association of Science Editors. 2013.

- 292 12. Nala R, Cummings B, Horth R, Inguane C, Benedetti M, Chissano M, et al. Men who have sex  
293 with men in Mozambique: identifying a hidden population at high-risk for HIV. *AIDS Behavior*.  
294 2015;19(2):393-404.
- 295 13. Moore DM, Cui Z, Lachowsky N, Raymond HF, Roth E, Rich A, et al. HIV Community Viral Load  
296 and Factors Associated With Elevated Viremia Among a Community-Based Sample of Men Who Have  
297 Sex With Men in Vancouver, Canada. *Journal of Acquired Immune Deficiency Syndrome*.  
298 2016;72(1):87-95.
- 299 14. Cherutich P, Kim AA, Kellogg TA, Sherr K, Waruru A, De Cock KM, et al. Detectable HIV Viral  
300 Load in Kenya: Data from a Population-Based Survey. *PLoS One*. 2016;11(5):e0154318.
- 301 15. Oluoch T, Katana A, Kwaro D, Santas X, Langat P, Mwalili S, et al. Effect of a clinical decision  
302 support system on early action on immunological treatment failure in patients with HIV in Kenya: a  
303 cluster randomised controlled trial. *The Lancet HIV*. 2016;3(2):e76-e84.
- 304 16. Jann B. Making regression tables from stored estimates. *The Stata Journal*, URL:  
305 <http://wwwstata-journal.com/articlehtml?article=st0085>. 2005;5(3):288-308.
- 306 17. Jann B. Making regression tables simplified. *The Stata Journal*, URL: [http://wwwstata-](http://wwwstata-journal.com/articlehtml?article=st0085_1)  
307 [journal.com/articlehtml?article=st0085\\_1](http://wwwstata-journal.com/articlehtml?article=st0085_1). 2007;7(2):227-44.
- 308 18. Brady T. REFORMAT: Stata module to reformat regression output. *Statistical Software*  
309 *Components S426304*, Boston College Department of Economics, revised 06 Oct 2002, URL:  
310 <https://ideasrepecorg/c/boc/bocode/s426304html>. 2002.
- 311 19. Wada R. OUTREG2: Stata module to arrange regression outputs into an illustrative table.  
312 *Statistical Software Components S456416*, Boston College Department of Economics, revised 17 Aug  
313 2014 URL: <https://ideasrepecorg/c/boc/bocode/s456416html>. 2005.

- 314 20. Hlavac M. stargazer: Well-Formatted Regression and Summary Statistics Tables. R package  
315 version 5.2.1. <https://CRAN.R-project.org/package=stargazer>. 2018.
- 316 21. Robinson D, Gomez M, Demeshev B, Menne D, Nutter B, Luke J, et al. broom: Convert Statistical  
317 Analysis Objects into Tidy Data Frames. URL: <https://cran.r-project.org/package=broom>. 2017.
- 318 22. Gohel D, Nazarov M. flextable: Functions for Tabular Reporting. URL: [https://cran.r-](https://cran.r-project.org/package=flextable)  
319 [project.org/package=flextable](https://cran.r-project.org/package=flextable). 2018.
- 320 23. SAS Institute Inc. SAS/STAT® 9.3 User's Guide. Cary, NC: SAS Institute Inc; 2011.
- 321 24. Gravely A, Clothier B, Nugent S. Creating an Easy to Use, Dynamic, Flexible Summary Table  
322 Macro with P-Values in SAS® for Research Studies. Proceedings from MidWest SAS Users Group Paper  
323 AA072014.
- 324 25. Qi J. Automating the Process of Generating Publication Quality Regression Tables through SAS®  
325 Base Programming. Proceedings from MiwWest SAS Users Group Paper BB232016.
- 326 26. Dhand NK. UniLogistic: A SAS Macro for Descriptive and Univariable Logistic Regression  
327 Analyses. Journal of Statistical Software. 2010;35(1):1-15.
- 328 27. SAS Institute Inc. Base SAS® 9.3. Cary, NC: SAS Institute Inc; 2011.
- 329 28. Centers for Disease Control and Prevention. Centers for Disease Control and Prevention (CDC).  
330 National Center for Health Statistics (NCHS). National Health and Nutrition Examination Survey Data.  
331 Hyattsville, MD: U.S. Department of Health and Human Services, Centers for Disease Control and  
332 Prevention, 2013-2014, URL: <https://www.cdc.gov/nchs/nhanes/Index.htm>: National Center for Health  
333 Statistics (NCHS); 2015 [

- 334 29. Johnson CL, Dohrmann SM, Burt VL, Mohadjer LK. National Health and Nutrition Examination  
335 Survey: Sample design, 2011–2014. National Center for Health Statistics. Vital and Health Statistics.  
336 2014;2( 162).
